# Supplementary material for: Tunable broadband near-infrared luminescence from Cr3+-doped gallium oxide-based phosphors for advanced sensing and LED applications
Source: Royal Society of Chemistry journal article supplement (doi:10.1039/d4qi00846d), 2024-01-01
Supplement: d4qi00846d1.pdf [file d4qi00846d1.pdf]

## Supplementary Information

### **Tunable Broadband Near-Infrared Luminescence from Cr<sup>3+</sup>-Doped Gallium Oxide-Based Phosphors for Advanced Sensing and LED Applications**

*Guocheng Pan,<sup>a</sup> Yaowu Wang,<sup>a</sup> Jianfeng Wang,<sup>b\*</sup> Zhenping Wu,<sup>c</sup> Yiheng Yue,<sup>a</sup> Nan Lin,<sup>a</sup> Shiqing Xu,<sup>a</sup> Gongxun Bai<sup>a\*</sup>*

<sup>a</sup> College of Optical and Electronic Technology, China Jiliang University, Hangzhou 310018, China.

<sup>b</sup> College of Science, China Jiliang University, Hangzhou 310018, China.

<sup>c</sup> Laboratory of Optoelectronics Materials and Devices, School of Science, Beijing University of Posts and Telecommunications, Beijing 100876, China

\*Corresponding author

E-mail address: jfwang@cjlu.edu.cn (J Wang), baigx@cjlu.edu.cn (G Bai)

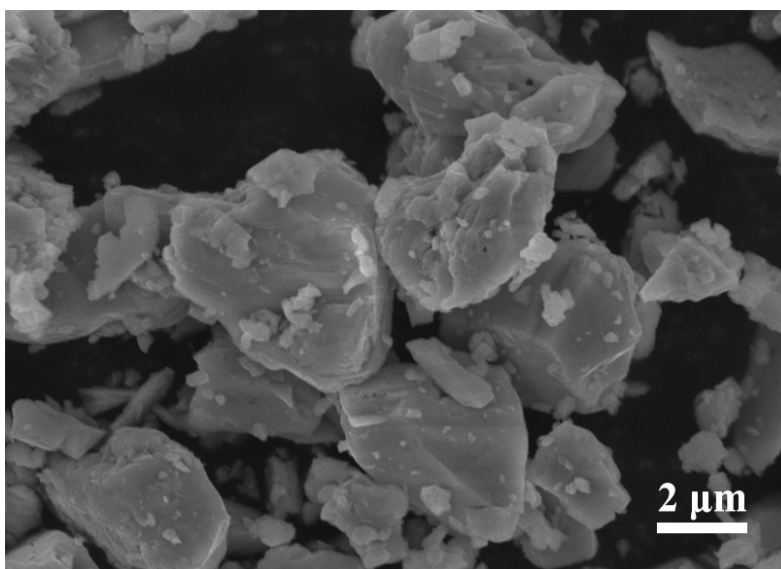

**Figure S1.** The SEM image of  $\text{Ga}_{1.57}\text{Zn}_{0.2}\text{Ge}_{0.2}\text{Cr}_{0.03}\text{O}_3$  phosphor.

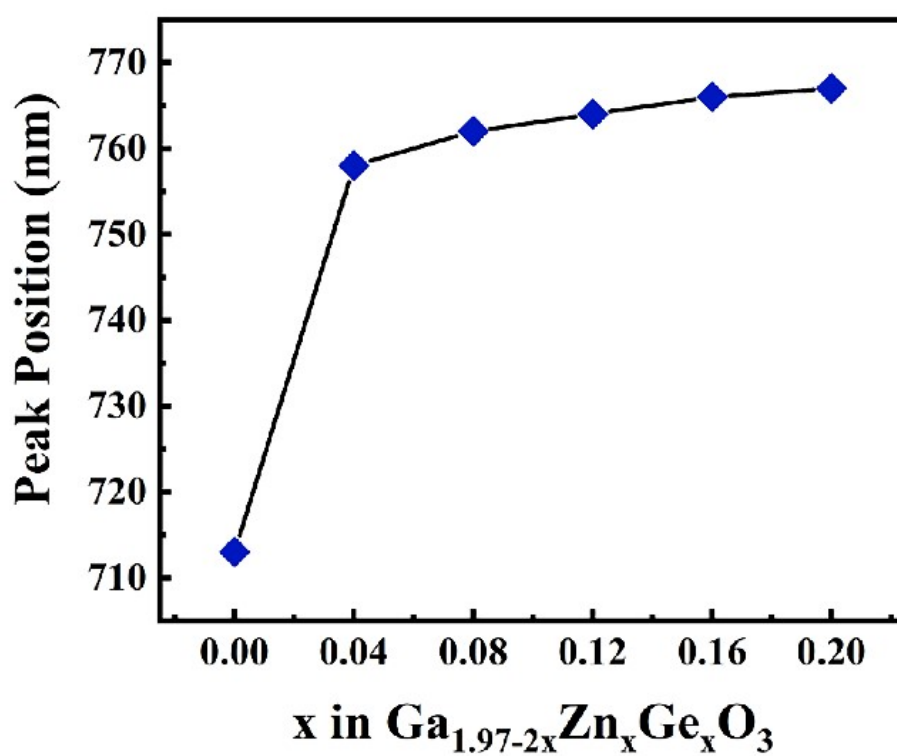

**Figure S2.** The emission spectra of peak position as a function of x in  $\text{Ga}_{1.97-2x}\text{Zn}_x\text{Ge}_x\text{Cr}_{0.03}\text{O}_3$  ( $x = 0 - 0.2$ ) phosphors.

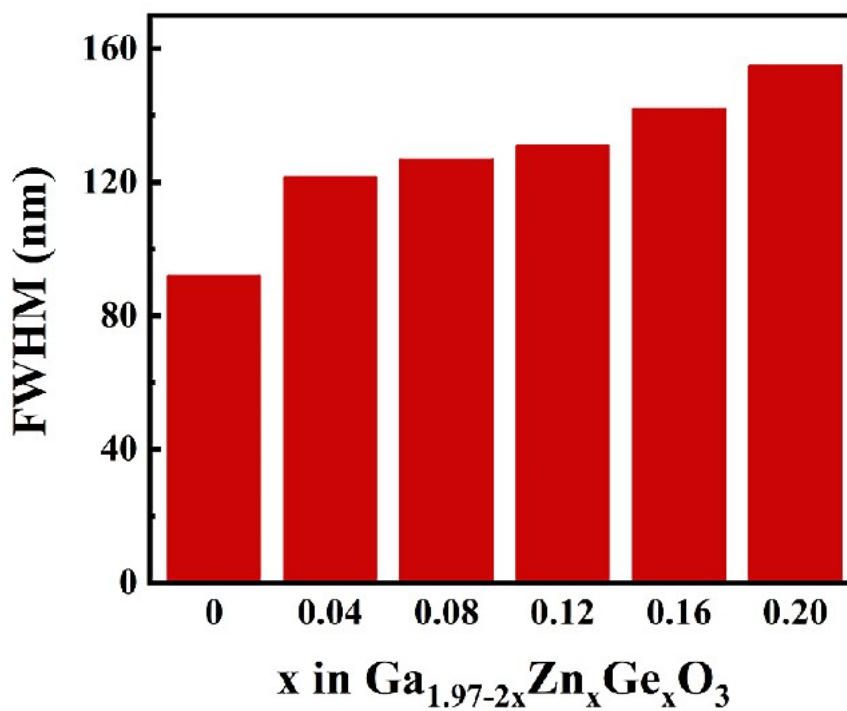

**Figure S3.** The emission spectra of FWHM as a function of x in  $\text{Ga}_{1.97-2x}\text{Zn}_x\text{Ge}_x\text{Cr}_{0.03}\text{O}_3$  (x = 0-0.2) phosphors.

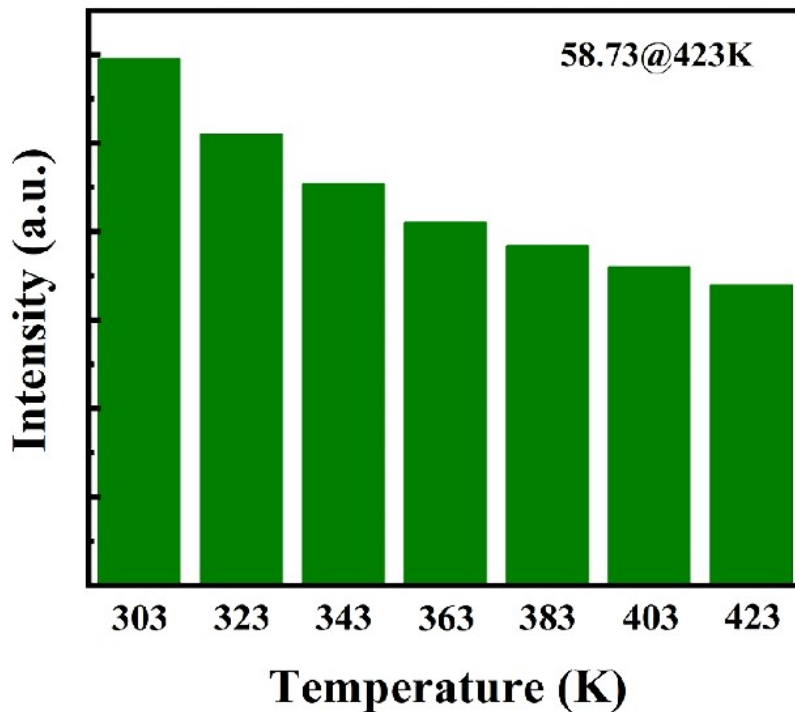

**Figure S4.** The intensity histograms of  $\text{Ga}_{1.57}\text{Zn}_{0.2}\text{Ge}_{0.2}\text{Cr}_{0.03}\text{O}_3$  at temperature ranges of 303 K-423 K.

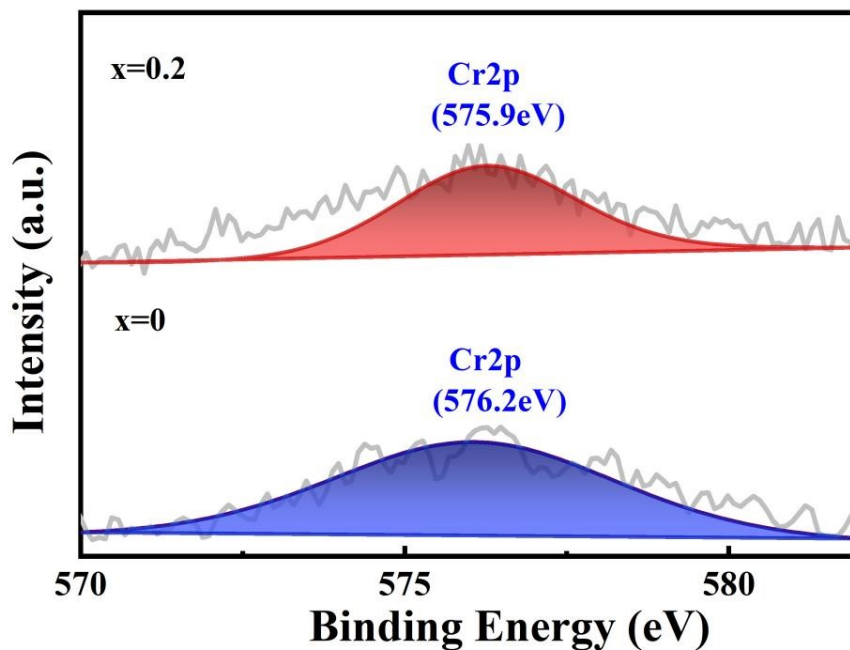

**Figure S5.** High-resolution Cr 2p XPS core energy level spectrum of  $\text{Ga}_{2-2x}\text{Zn}_x\text{Ge}_x\text{Cr}_{0.03}\text{O}_3$  doped with different co-unit concentrations.

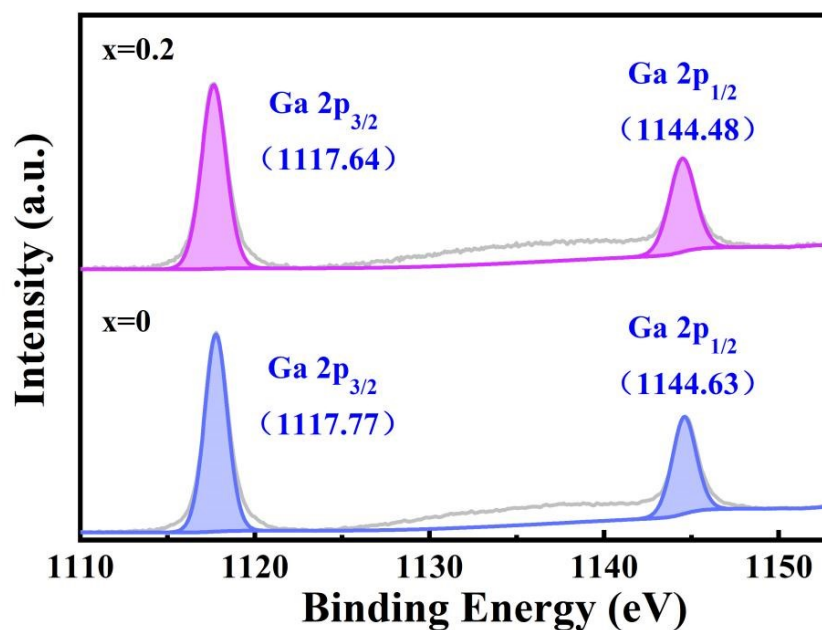

**Figure S6.** High-resolution Ga 2p XPS core energy level spectrum of  $\text{Ga}_{2-2x}\text{Zn}_x\text{Ge}_x\text{Cr}_{0.03}\text{O}_3$  doped with different co-unit concentrations.
